# Supplementary material for: Tegument Glycoproteins and Cathepsins of Newly Excysted Juvenile Fasciola hepatica Carry Mannosidic and Paucimannosidic N-glycans
Source: PubMed Central journal article supplement (PMC4854454; doi:10.1371/journal.pntd.0004688), 2016-05-03
Supplement: pntd.0004688.s005.pdf [file pntd.0004688.s005.pdf]

**S1 Table. Comparison of the protein amino acid sequence of the FhCBs to gi|27526823**

| <b>Protein</b>        | <b>Identifier</b>   | <b>Residue<br/>Overlap</b> | <b>Identity<br/>(%)</b> | <b>Similarity<br/>(%)</b> | <b>Gaps<br/>(%)</b> | <b>Score</b> |
|-----------------------|---------------------|----------------------------|-------------------------|---------------------------|---------------------|--------------|
| Novel Partial<br>FhCB | BN1106_s5100B000033 | 224                        | 67.9                    | 74.6                      | 0                   | 844          |
| FhCB1                 | BN1106_s6570B000050 | 337                        | 89.6                    | 91.1                      | 8.3                 | 1560         |
| FhCB2                 | BN1106_s4482B000044 | 303                        | 66.3                    | 78.9                      | 0                   | 1178         |
| FhCB3                 | BN1106_s6570B000051 | 215                        | 69.8                    | 80                        | 0                   | 852          |

Pairwise alignment settings: EBLOSUM62 matrix, gap opening penalty = 14, gap extension penalty = 4
