# Supplementary material for: Tegument Glycoproteins and Cathepsins of Newly Excysted Juvenile Fasciola hepatica Carry Mannosidic and Paucimannosidic N-glycans
Source: PubMed Central journal article supplement (PMC4854454; doi:10.1371/journal.pntd.0004688), 2016-05-03
Supplement: pntd.0004688.s006.pdf [file pntd.0004688.s006.pdf]

**S2 Table. Annotation of the additional glycopeptides identified in NEJTeg at bands 1, 2, 3 and 4 that did not correspond to the cathepsins.**

| <b>Peptide <i>m/z</i> [M+H]<sup>+</sup></b> | <b>Glycan CID-MS</b> | <b>Bands</b> |
|---------------------------------------------|----------------------|--------------|
| 2561.2                                      | F1H3N2               | 2            |
| 2560.4                                      | F1H3N2               | 1            |
| 2544.8                                      | F1H3N2               | 1            |
| 2269.2                                      | F1H2N2               | 1            |
| 2269.1                                      | H2N2                 | 1            |
| 2095.2                                      | F1H2N2               | 1            |
| 2059.2                                      | F1H2N2               | 2            |
| 2058.9                                      | F1H2N2               | 2            |
| 1869                                        | F1H3N2               | 1            |
| 1868.1                                      | F1H3N2               | 2            |
| 1854                                        | F1H3N2               | 1            |
| 1807.2                                      | H5N2                 | 4            |
| 1807.1                                      | H4N2                 | 4            |
| 1807.1                                      | H3N2                 | 4            |
| 1788.2                                      | H5N2                 | 1, 2         |
| 1788.2                                      | H4N2                 | 1, 2         |
| 1788.2                                      | H3N2                 | 1            |
| 1787.9                                      | H2N2                 | 1            |
| 1737.8                                      | H5N2                 | 4            |
| 1631.9                                      | H4N2                 | 1            |
| 1352                                        | H6N2                 | 4            |
| 1340                                        | H5N2                 | 2            |
| 1339.7                                      | H5N2                 | 3            |
| 1317.8                                      | H5N2                 | 3            |
| 1317.8                                      | H4N2                 | 3            |
| 1268                                        | H9N2                 | 1, 3, 4      |
| 1268                                        | H8N2                 | 3, 4         |
| 1252.1                                      | H9N2                 | 1, 3, 4      |
| 964.8                                       | F1H5N2               | 1            |
| 964.8                                       | H5N2                 | 1            |
| 964.8                                       | F1H4N2               | 1, 2, 3      |
| 964.8                                       | F1H3N2               | 1, 2, 3, 4   |
| 896.8                                       | H5N2                 | 2            |
| 860.8                                       | F1H3N2               | 2            |
| 733.8                                       | H5N2                 | 1, 4         |
| 733.8                                       | H4N2                 | 1            |
| 733.6                                       | H5N2                 | 2            |
| 733.6                                       | F1H4N2               | 1            |
| 733.6                                       | H4N2                 | 2, 3, 4      |
| 733.6                                       | F1H3N2               | 2            |
| 733.6                                       | H3N2                 | 1, 2, 3, 4   |
| 733.6                                       | F1H2N2               | 1, 2, 3      |
| 733.6                                       | H2N2                 | 1            |
